# Supplementary material for: Impact of body mass index on real-world outcomes of rivaroxaban treatment in Japanese patients with non-valvular atrial fibrillation
Source: PubMed Central journal article supplement (PMC7332477; doi:10.1007/s00380-020-01587-z), 2020-04-06

**Supplementary Figure 1. CrCl and rivaroxaban dosing in patients stratified by BMI\*.**

\* BMI categories (kg/m<sup>2</sup>): underweight, <18.5; normal, 18.5 to <25; overweight, 25 to <30; and obese, ≥30

- No CrCl data
- Patients with CrCl <50 ml/min receiving rivaroxaban 15 mg o.d. (overdose)
- Patients with CrCl <50 ml/min receiving rivaroxaban 10 mg o.d. (appropriate dose)
- Patients with CrCl ≥50 ml/min receiving rivaroxaban 15 mg o.d. (appropriate dose)
- Patients with CrCl ≥50 ml/min receiving rivaroxaban 10 mg o.d. (underdose)

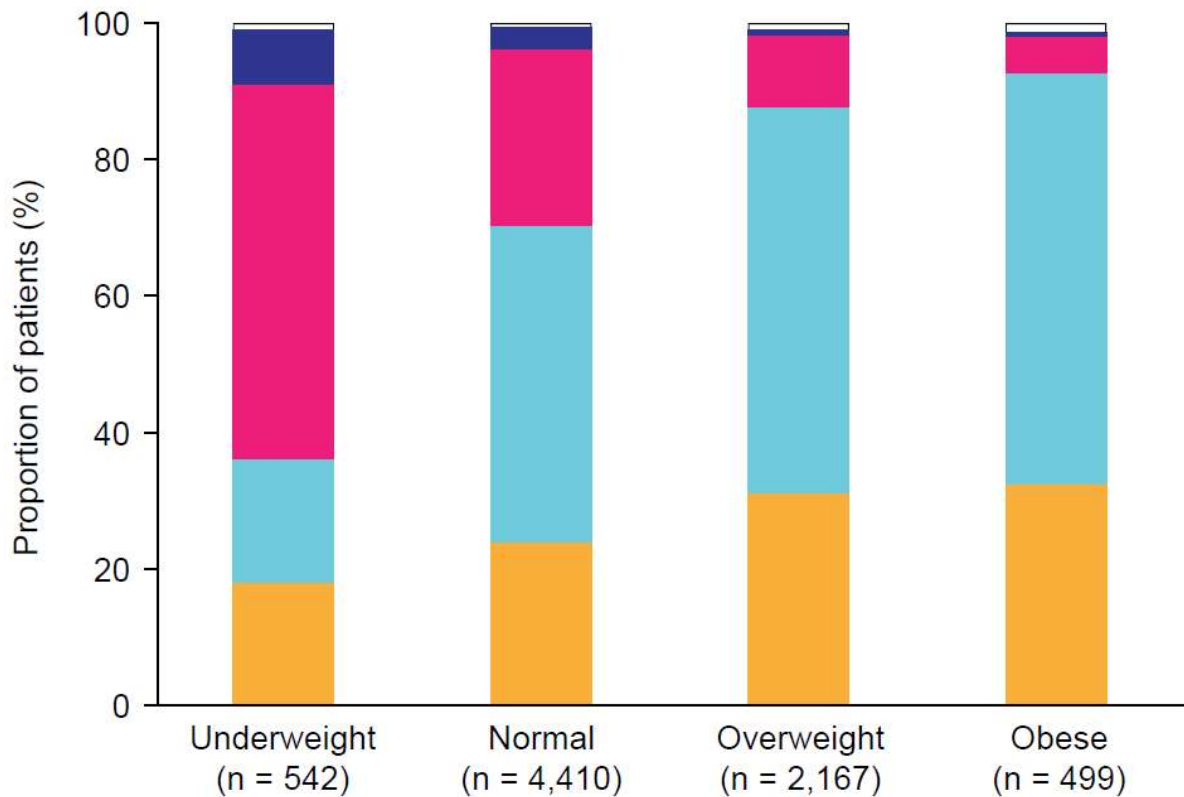

Supplement: 380_2020_1587_MOESM1_ESM.pdf [file 380_2020_1587_MOESM1_ESM.pdf]
