# Supplementary material for: Impact of body mass index on real-world outcomes of rivaroxaban treatment in Japanese patients with non-valvular atrial fibrillation
Source: PubMed Central journal article supplement (PMC7332477; doi:10.1007/s00380-020-01587-z), 2020-04-06
Supplement: 380_2020_1587_MOESM2_ESM.pdf [file 380_2020_1587_MOESM2_ESM.pdf]

## Supplementary Table 1

Safety and effectiveness outcomes

|                                                             | BMI (kg/m <sup>2</sup> )   |                               |                                 |                        |
|-------------------------------------------------------------|----------------------------|-------------------------------|---------------------------------|------------------------|
|                                                             | Underweight<br>( $<18.5$ ) | Normal<br>( $18.5$ to $<25$ ) | Overweight<br>( $25$ to $<30$ ) | Obese<br>( $\geq 30$ ) |
| Safety outcome                                              | (n = 542)                  | (n = 4,410)                   | (n = 2,167)                     | (n = 499)              |
| Any bleeding                                                | 46 (8.49)                  | 307 (6.96)                    | 128 (5.91)                      | 23 (4.61)              |
| Major bleeding                                              | 9 (1.66)                   | 70 (1.59)                     | 32 (1.48)                       | 7 (1.40)               |
| Fatal                                                       | 1 (0.18)                   | 4 (0.09)                      | 6 (0.28)                        | 0 (0)                  |
| Critical organ bleeding                                     | 3 (0.55)                   | 32 (0.73)                     | 18 (0.83)                       | 0 (0)                  |
| Intracranial hemorrhage                                     | 3 (0.55)                   | 29 (0.66)                     | 15 (0.69)                       | 0 (0)                  |
| Hemoglobin decrease $\geq 2$ g/dl                           | 3 (0.55)                   | 26 (0.59)                     | 10 (0.46)                       | 5 (1.00)               |
| Transfusion of $\geq 2$ units of packed RBCs or whole blood | 2 (0.37)                   | 8 (0.18)                      | 3 (0.14)                        | 1 (0.20)               |
| All-cause mortality                                         | 44 (8.12)                  | 72 (1.63)                     | 33 (1.52)                       | 4 (0.80)               |
| Death caused by adverse drug reaction                       | 2 (0.37)                   | 8 (0.18)                      | 8 (0.37)                        | 0 (0)                  |
| Effectiveness outcome                                       | (n = 540)                  | (n = 4,392)                   | (n = 2,161)                     | (n = 497)              |
| Stroke/non-CNS SE/MI                                        | 15 (2.78)                  | 63 (1.43)                     | 33 (1.53)                       | 7 (1.41)               |
| Stroke                                                      | 12 (2.22)                  | 58 (1.32)                     | 30 (1.39)                       | 5 (1.01)               |
| Ischemic stroke                                             | 9 (1.67)                   | 40 (0.91)                     | 20 (0.93)                       | 5 (1.01)               |

BMI = body mass index; CNS = central nervous system; MI = myocardial infarction; RBC = red blood cell; SE = systemic embolism.

Data are presented as n (%).
